# Supplementary material
Source: publisher site journal article supplement (https://www.dovepress.com/article/433583)
Supplement: Supplementary file 1 [file get_supplementary_file.php]

**Supplementary Table 1.** Medication status

|  | **Total** | **LAMA/LABA** | **ICS/LABA** | **LAMA/LABA/ICS** | *p*-value |
| --- | --- | --- | --- | --- | --- |
| **Inhaler N (%)** |  |  |  |  |  |
| LAMA + LABA | - | 12,154 (42.9) | - | - | **-** |
| Combination inhaler (LAMA/LABA) | **-** | 16,168 (57.1) | **-** | **-** | **-** |
| ICS + LABA | - | - | 8,614 (72.9) | - | **-** |
| Combination inhaler (ICS/LABA) | **-** | **-** | 3,198 (27.1) | **-** | **-** |
| **Oral medication** |  |  |  |  |  |
| Roflumilast | 706 (1.5) | 373 (1.3) | 82 (0.7) | 251 (4.1) | <0.001 |
| Xanthine | 17,857 (38.6) | 9,845 (34.8) | 5,123 (43.4) | 2,889 (46.8) | <0.001 |
| Mucolytics | 25,511 (55.1) | 14,689 (51.9) | 7,188 (60.9) | 3,634 (58.9) | <0.001 |
| Glucocorticoid | 6,659 (14.4) | 2,840 (10.0) | 2,461 (20.8) | 1,358 (22.0) | <0.001 |

Abbreviations: LAMA, long-acting muscarinic antagonists; LABA, long-acting β2-agonists; ICS, inhaled corticosteroids

**Supplementary Table 2.** The annual incidence of cardiovascular events

| Cardovascular event |  | LAMA/LABA | | ICS/LABA | | LAMA/LABA/ICS | | *P* - value |
| --- | --- | --- | --- | --- | --- | --- | --- | --- |
| Year | N | % | N | % | N | % |
| Ischemic heart disease | first year | 535 | 50.6 | 159 | 43.7 | 131 | 48.9 | 0.074 |
|  | second year | 266 | 25.2 | 105 | 28.8 | 59 | 22.0 | 0.141 |
|  | third year | 156 | 14.8 | 53 | 14.6 | 45 | 16.8 | 0.679 |
|  | fourth year | 72 | 6.8 | 34 | 9.3 | 23 | 8.6 | 0.240 |
|  | fifth year | 28 | 2.6 | 13 | 3.6 | 10 | 3.7 | 0.512 |
| Arrhythmia | first year | 256 | 47.3 | 82 | 41 | 85 | 42.1 | 0.206 |
|  | second year | 117 | 21.6 | 46 | 23 | 58 | 28.7 | 0.126 |
|  | third year | 99 | 18.3 | 45 | 22.5 | 34 | 16.8 | 0.304 |
|  | fourth year | 54 | 10.0 | 21 | 10.5 | 19 | 9.4 | 0.935 |
|  | fifth year | 15 | 2.8 | 6 | 3 | 6 | 3.0 | 0.981 |
| Atrial fibrillation/flutter | first year | 97 | 55.1 | 26 | 45.6 | 47 | 58.0 | 0.328 |
|  | second year | 36 | 20.5 | 11 | 19.3 | 19 | 23.5 | 0.808 |
|  | third year | 25 | 14.2 | 11 | 19.3 | 9 | 11.1 | 0.400 |
|  | fourth year | 14 | 8.0 | 7 | 12.3 | 5 | 6.2 | 0.428 |
|  | fifth year | 4 | 2.3 | 2 | 3.5 | 1 | 1.2 | 0.762 |
| Heart failure | first year | 159 | 50.8 | 80 | 56.3 | 57 | 44.2 | 0.136 |
|  | second year | 75 | 24.0 | 29 | 20.4 | 34 | 26.4 | 0.507 |
|  | third year | 51 | 16.3 | 20 | 14.1 | 22 | 17.1 | 0.773 |
|  | fourth year | 18 | 5.8 | 10 | 7.0 | 11 | 8.5 | 0.557 |
|  | fifth year | 10 | 3.2 | 3 | 2.1 | 5 | 3.9 | 0.729 |

Abbreviations: LAMA, long-acting muscarinic antagonists; LABA, long-acting β2-agonists; ICS, inhaled corticosteroids

**Supplementary Table 3.** Risk factors for the development of ischemic heart disease and heart failure in COPD.

| Variables | Univariable Cox regression analysis | | | |
| --- | --- | --- | --- | --- |
| Ischemic heart disease | | Heart failure | |
| Hazard ratio (95% CI) | *p*-value | Hazard ratio (95% CI) | *p*-value |
| Therapeutic intervention |  |  |  |  |
| LAMA/LABA therapy | 1.32 (1.17 ─ 1.48) | <0.001 | 0.99 (0.81 ─ 1.21) | 0.917 |
| Triple therapy | 1.50 (1.28 ─ 1.75) | <0.001 | 1.84 (1.45 ─ 2.33) | <0.001 |
| ICS/LABA therapy | ref. |  | ref. |  |
| Age group (years) |  |  |  |  |
| 40-49 | ref. |  | ref. |  |
| 50-59 | 1.44 (0.97 ─ 2.16) | 0.073 | 7.61 (1.04 ─ 55.75) | 0.046 |
| 60-69 | 2.61 (1.79 ─ 3.82) | <0.001 | 11.78 (1.64 ─ 84.43) | 0.014 |
| 70-79 | 3.05 (2.09 ─ 4.45) | <0.001 | 30.86 (4.33 ─ 219.76) | 0.001 |
| 80- | 2.95 (2.00 ─ 4.36) | <0.001 | 70.44 (9.88 ─ 502.05) | <0.001 |
| Sex (male) | 2.11 (1.82 ─ 2.46) | <0.001 | 0.82 (0.68 ─ 1.00) | 0.046 |
| Asthma | 0.87 (0.80 ─ 0.96) | 0.006 | 1.19 (1.02 ─ 1.41) | 0.033 |
| Hypertension | 2.19 (1.98 ─ 2.42) | <0.001 | 3.45 (2.87 ─ 4.15) | <0.001 |
| Diabetes mellitus | 1.76 (1.59 ─ 1.95) | <0.001 | 1.95 (1.65 ─ 2.31) | <0.001 |
| Tuberculosis | 0.76 (0.59 ─ 0.97) | 0.026 | 0.66 (0.42 ─ 1.02) | 0.063 |
| Diffuse interstitial lung disease | 1.42 (0.89 ─ 2.26) | 0.137 | 1.13 (0.47 ─ 2.72) | 0.791 |
| Lung cancer | 1.17 (0.82 ─ 1.66) | 0.382 | 0.94 (0.49 ─ 1.81) | 0.850 |
| Charlson Comorbidity Index score |  |  |  |  |
| 0 (CCI score = 0) | ref. |  | ref. |  |
| 1 (CCI score = 1) | 0.73 (0.58 ─ 0.93) | 0.010 | 1.04 (0.61 ─ 1.78) | 0.886 |
| 2 (CCI score = 2) | 0.94 (0.74 ─ 1.20) | 0.618 | 1.23 (0.72 ─ 2.12) | 0.449 |
| 3 (CCI score ≥ 3) | 1.54 (1.24 ─ 1.92) | 0.001 | 3.47 (2.10 ─ 5.71) | <0.001 |
| Inpatient hospitalization (any reason) |  |  |  |  |
| 0 | ref. |  | ref. |  |
| 1 | 1.31 (1.16 ─ 1.47) | <0.001 | 2.20 (1.79 ─ 2.69) | <0.001 |
| ≥2 | 1.64 (1.46 ─ 1.84) | <0.001 | 3.04 (2.51 ─ 3.68) | <0.001 |
| Emergency room visit (any reason) |  |  |  |  |
| 0 | ref. |  | ref. |  |
| 1 | 1.22 (1.07 ─ 1.39) | 0.003 | 2.24 (1.84 ─ 2.72) | <0.001 |
| ≥2 | 2.10 (1.82 ─ 2.44) | <0.001 | 3.98 (3.21 ─ 4.94) | <0.001 |

Abbreviations: LAMA, long-acting muscarinic antagonists; LABA, long-acting β2-agonists; ICS, inhaled corticosteroids

**Supplementary Table 4.** Risk factors for the development of arrhythmia in COPD.

| Variables | Univariable Cox regression analysis | | | |
| --- | --- | --- | --- | --- |
| Arrhythmia | | Atrial fibrillation /flutter | |
| Hazard ratio (95% CI) | *p*-value | Hazard ratio (95% CI) | *p*-value |
| Therapeutic intervention |  |  |  |  |
| LAMA/LABA therapy | 1.24 (1.05 ─ 1.45) | 0.011 | 1.39 (1.03 ─ 1.87) | 0.033 |
| Triple therapy | 2.07 (1.70 ─ 2.51) | <0.001 | 2.87 (2.05 ─ 4.03) | <0.001 |
| ICS/LABA therapy | ref. |  | ref. |  |
| Age group (years) |  |  |  |  |
| 40-49 | ref. |  | ref. |  |
| 50-59 | 1.15 (0.68 ─ 1.95) | 0.598 | 1.58 (0.55 ─ 4.54) | 0.394 |
| 60-69 | 1.59 (0.97 ─ 2.61) | 0.065 | 2.08 (0.76 ─ 5.71) | 0.154 |
| 70-79 | 2.97 (1.83 ─ 4.82) | <0.001 | 4.35 (1.61 ─ 11.75) | 0.004 |
| 80- | 4.73 (2.89 ─ 7.75) | <0.001 | 6.37 (2.33 ─ 17.40) | <0.001 |
| Sex (male) | 1.17 (0.99 ─ 1.38) | 0.065 | 1.27 (0.94 ─ 1.71) | 0.115 |
| Asthma | 1.07 (0.94 ─ 1.22) | 0.286 | 1.15 (0.92 ─ 1.43) | 0.218 |
| Hypertension | 1.97 (1.73 ─ 2.25) | <0.001 | 2.58 (2.04 ─ 3.27) | <0.001 |
| Diabetes mellitus | 1.65 (1.44 ─ 1.89) | <0.001 | 1.73 (1.37 ─ 2.18) | <0.001 |
| Tuberculosis | 1.31 (1.02 ─ 1.69) | 0.038 | 0.93 (0.55 ─ 1.56) | 0.776 |
| Diffuse interstitial lung disease | 2.45 (1.52 ─ 3.96) | <0.001 | 1.26 (0.40 ─ 3.92) | 0.691 |
| Lung cancer | 1.46 (0.96 ─ 2.23) | 0.079 | 1.77 (0.91 ─ 3.44) | 0.091 |
| Charlson Comorbidity Index score |  |  |  |  |
| 0 (CCI score = 0) | ref. |  | ref. |  |
| 1 (CCI score = 1) | 0.95 (0.65 ─ 1.39) | 0.782 | 0.62 (0.33 ─ 1.16) | 0.133 |
| 2 (CCI score = 2) | 1.47 (1.01 ─ 2.15) | 0.045 | 0.99 (0.54 ─ 1.83) | 0.981 |
| 3 (CCI score ≥ 3) | 2.50 (1.75 ─ 3.56) | <0.001 | 2.21 (1.26 ─ 3.86) | 0.006 |
| Inpatient hospitalization (any reason) |  | <0.001 |  |  |
| 0 | ref. |  | ref. |  |
| 1 | 1.57 (1.34 ─ 1.84) | <0.001 | 1.45 (1.09 ─ 1.93) | 0.011 |
| ≥2 | 2.03 (1.75 ─ 2.37) | <0.001 | 2.33 (1.81 ─ 3.01) | <0.001 |
| Emergency room visit (any reason) |  |  |  | <0.001 |
| 0 | ref. |  | ref. |  |
| 1 | 1.89 (1.62 ─ 2.21) | <0.001 | 1.97 (1.51 ─ 2.57) | <0.001 |
| ≥2 | 2.47 (2.04 ─ 3.00) | <0.001 | 2.45 (1.75 ─ 3.42) | <0.001 |

Abbreviations: LAMA, long-acting muscarinic antagonists; LABA, long-acting β2-agonists; ICS, inhaled corticosteroids
